# Supplementary material for: Desmosomal COP9 regulates proteome degradation in arrhythmogenic right ventricular dysplasia/cardiomyopathy
Source: JCI journal article supplement (doi:10.1172/jci137689), 2021-04-15
Supplement: sd1 [file 1]

## SUPPLEMENTAL DATA

### **Desmosomal COP9 regulates proteome degradation in arrhythmogenic right ventricular dysplasia/cardiomyopathy**

Yan Liang<sup>1</sup>, Robert C. Lyon<sup>1</sup>, Jason Pellman<sup>1</sup>, William H. Bradford<sup>1</sup>, Stephan Lange<sup>1,2</sup>, Julius Bogomolovas<sup>1</sup>, Nancy D. Dalton<sup>1</sup>, Yusu Gu<sup>1</sup>, Marcus Bobar<sup>1</sup>, Mong-Hong Lee<sup>3</sup>, Tomoo Iwakuma<sup>4</sup>, Vishal Nigam<sup>5,6</sup>, Angeliki Asimaki<sup>7</sup>, Melvin Scheinman<sup>8</sup>, Kirk L. Peterson<sup>1</sup> and Farah Sheikh<sup>1\*</sup>

<sup>1</sup>Department of Medicine, University of California San Diego, 9500 Gilman Drive, La Jolla, CA, 92093, USA; <sup>2</sup>Institute of Medicine, Department of Molecular and Clinical Medicine and Wallenberg Centre for Molecular and Translational Medicine, University of Gothenburg, Gothenburg, Sweden; <sup>3</sup>Department of Molecular and Cellular Oncology, The University of Texas MD Anderson Cancer Center, Houston, TX, 77030, USA; <sup>4</sup>Department of Cancer Biology, University of Kansas Medical Center, Kansas City, KS, 66010, USA; <sup>5</sup>Department of Pediatrics, University of California San Diego, 9500 Gilman Drive, La Jolla, CA, 92093, USA; <sup>6</sup>Department of Pediatrics, Seattle Children's Research Institute and University of Washington, 1900 Ninth Ave, Seattle, WA, 98101, USA; <sup>7</sup>Cardiology Clinical Academic Group, St. George's University of London, Cranmer Terrace, London, UK; <sup>8</sup>Department of Medicine, Cardiac Electrophysiology Section, University of California San Francisco, 500 Parnassus Avenue, San Francisco, CA, 94143, USA

Corresponding author: Farah Sheikh, Department of Medicine, University of California San Diego, 9500 Gilman Drive, La Jolla, CA, 92093-0613C. Tel: (858) 246-0754, Fax: (858) 822-1355; email address: [fasheikh@health.ucsd.edu](mailto:fasheikh@health.ucsd.edu)

## Supplemental Figure 1

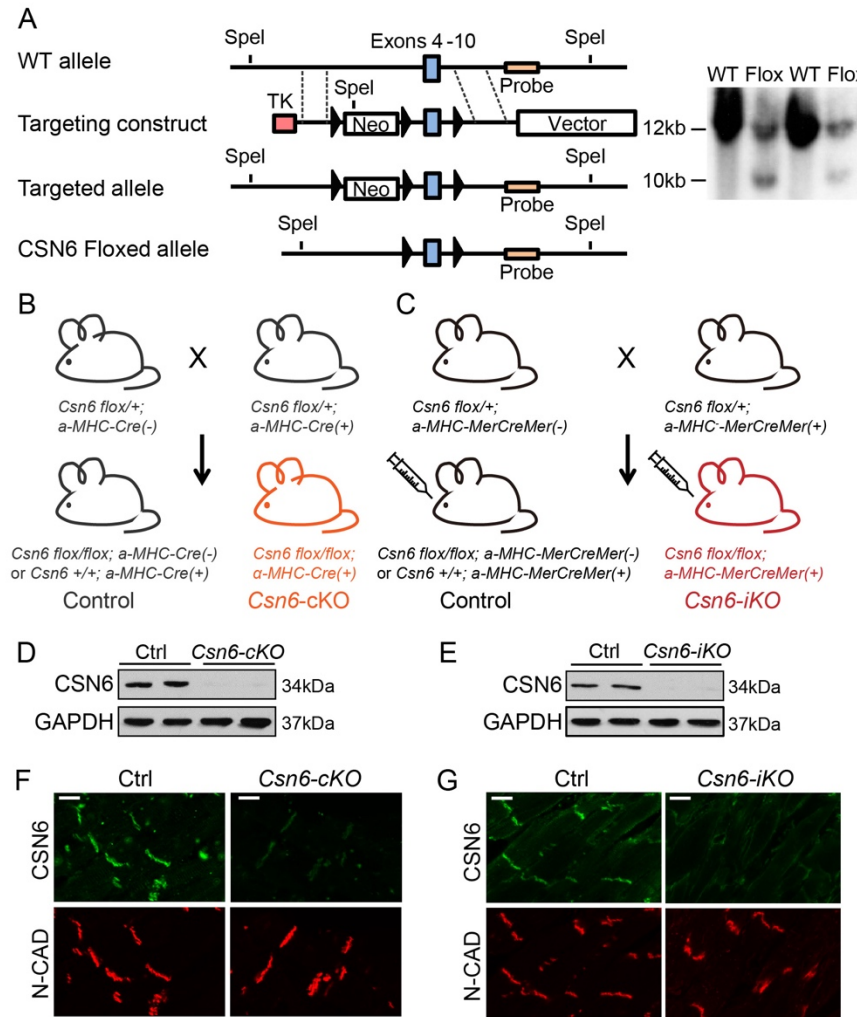

**Supplemental Figure 1: Generation and validation of CSN6 loss in cardiac specific and cardiac inducible *Csn6* knockout mice.** (A) Restriction map of the relevant genomic region of *Csn6*, targeting construct, the mutated locus following recombination and *Csn6* floxed allele (left). TK: thymidine kinase gene, Neo: neomycin resistance gene. Detection WT and mutant (target) alleles by southern blot analysis (right). (B) Schematic representation of breeding strategy to generate *Csn6*-cKO (*Csn6* flox/flox; *a-MHC-Cre*(+)) and littermate control (*Csn6* flox/flox; *a-MHC-Cre*(-) or *Csn6* +/+; *a-MHC-Cre*(+)) mice. (C) Schematic representation of breeding strategy to generate *Csn6*-iKO (*Csn6* flox/flox; *a-MHC-MerCreMer*(+)) and littermate control (*Csn6* flox/flox; *a-MHC-MerCreMer*(-) or *Csn6* +/+; *a-MHC-MerCreMer*(+)) mice. To induce ablation of *Csn6*, 5- to 6-week-old mice were treated with daily intraperitoneal injection of tamoxifen (Sigma, 50μg/g per day) for 5 consecutive days. (D and E) Protein blot analysis of CSN6 in total

protein extracts from *Csn6*-cKO and control mice at 2 weeks of age (**D**) and *Csn6*-iKO mice at 2 weeks post tamoxifen injection (**E**) (n=4 mice). GAPDH is used as a loading control. (**F** and **G**) Immunofluorescence staining of CSN6 (green) and N-cadherin (red) in cardiac sections from *Csn6*-cKO and control mice at 2 weeks of age (**F**) and *Csn6*-iKO at 2 weeks post tamoxifen injection (**G**). Scale Bar: 10  $\mu$ m.

## Supplemental Figure 2

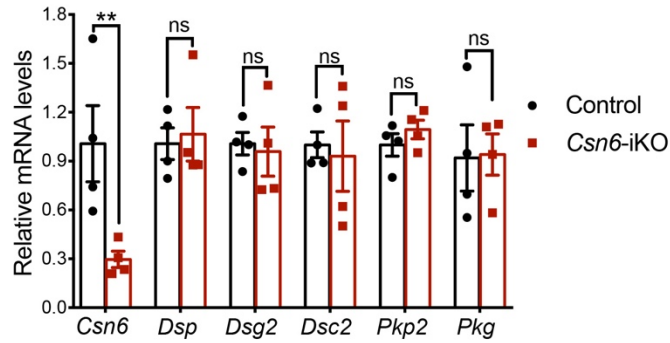

**Supplemental Figure 2: RNA levels of desmosomal genes are not impacted in *Csn6* knockout hearts.** Quantitative RT-PCR analysis of *Csn6* and desmosomal gene expression in *Csn6*-iKO and control mouse hearts at 6 weeks post-tamoxifen injection (n=4 mice). *18S* and *Gapdh* RNA were used as loading controls and showed similar results. Data are mean  $\pm$  s.e.m; two-way ANOVA with Sidak multiple comparison test, \*\* $P < 0.01$ , ns, not significant.

### Supplemental Figure 3

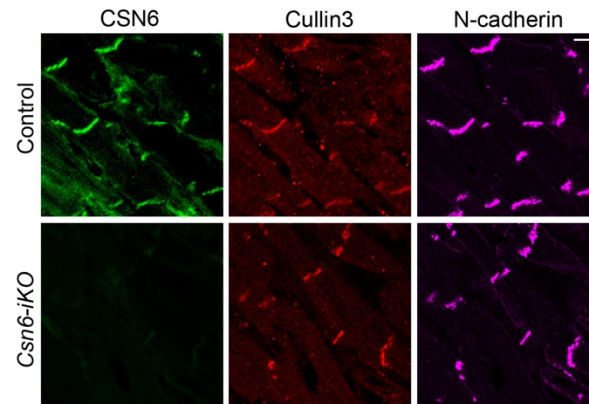

**Supplemental Figure 3: Cullin 3 is localized to the cardiac cell-cell junction in adult WT and *Csn6*-iKO mouse hearts.** Immunofluorescence staining of Cullin 3 (red), CSN6 (green) and N-cadherin (magenta) in control and *Csn6*-iKO mouse hearts at 6 weeks post tamoxifen injection (n=3 per group). Scale bar: 10 $\mu$ m.

#### Supplemental Figure 4

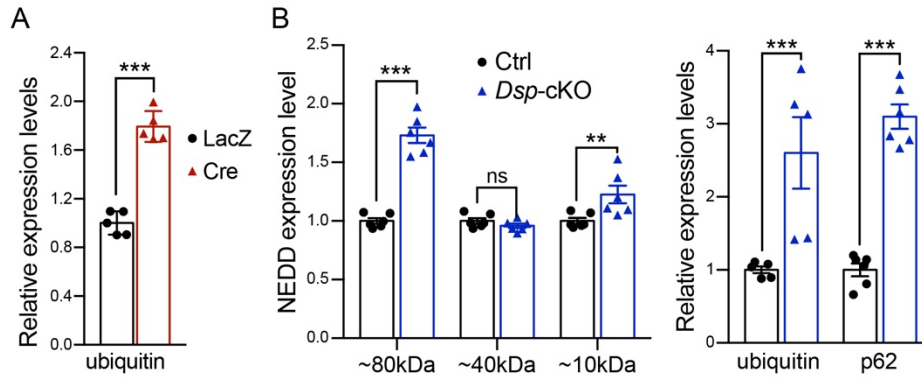

#### Supplemental Figure 4: Quantification of protein expression levels in Figure 4 and Figure 5.

(A) Quantification of protein expression levels in Figure 4A. The expression levels of the proteins were normalized to the loading control GAPDH. Data are mean  $\pm$  s.e.m; two-tailed Student's t-test. \*\*\* $P < 0.001$ . (B) Quantification of protein expression levels in Figure 5A. The expression levels of the proteins were normalized to the loading control GAPDH. Data are mean  $\pm$  s.e.m; two-way ANOVA with Sidak multiple comparison test, \*\* $P < 0.01$ , \*\*\* $P < 0.001$ , ns, not significant.

## Supplemental Figure 5

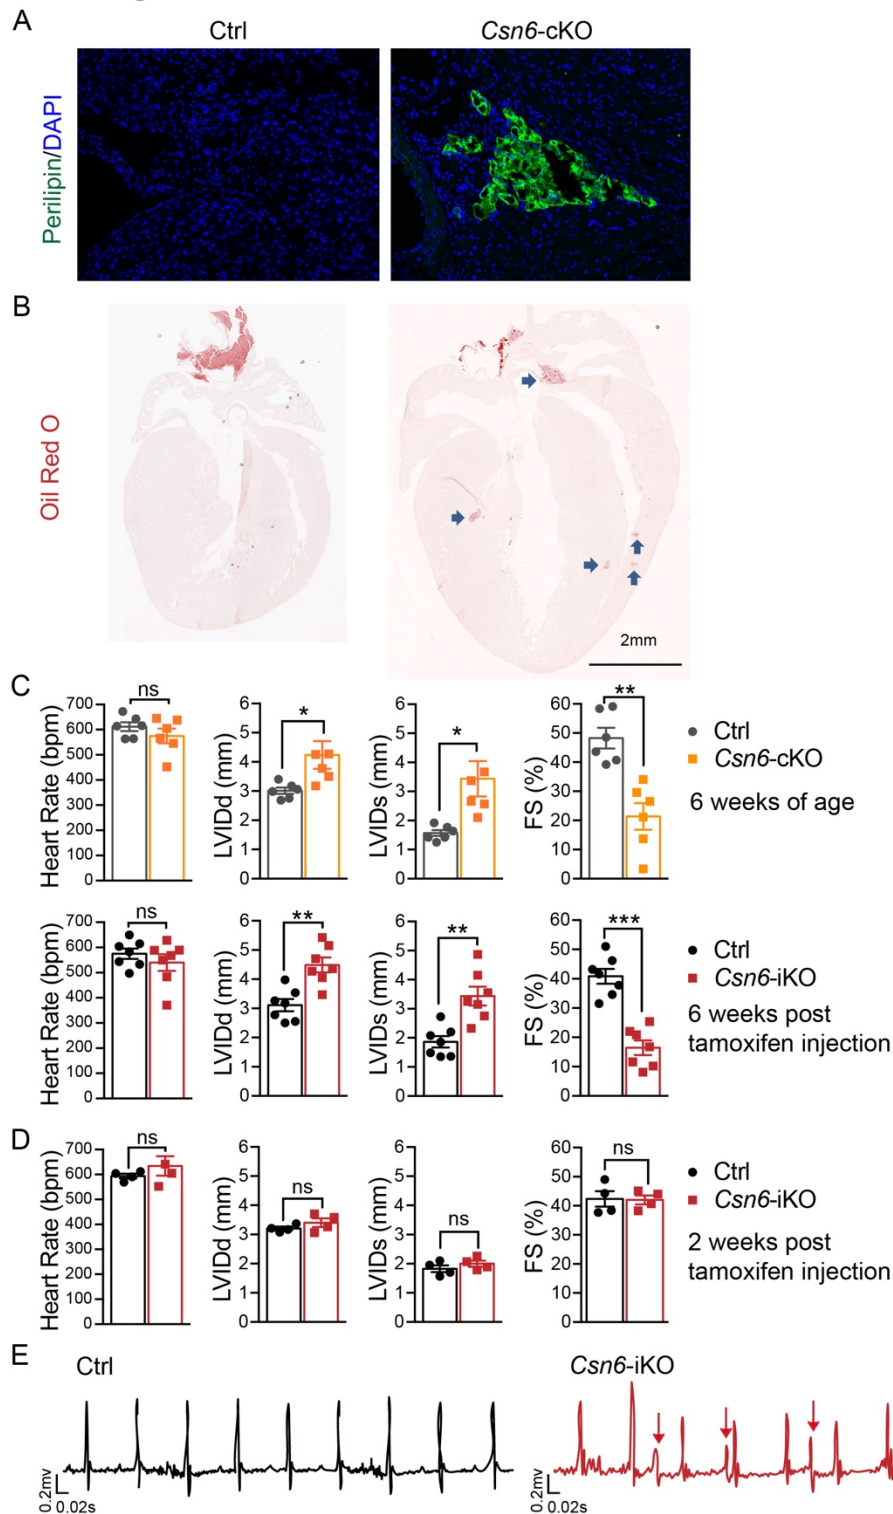

**Supplemental Figure 5: Characterization of cardiac specific *Csn6* knockout mice.** (A) Immunofluorescence staining of perilipin in triangular area of cardiac sections in *Csn6*-cKO and control mice at 6 weeks of age. Cardiac sections were counterstained with DAPI nuclear stain

(blue). Scale Bar: 100  $\mu$ m. **(B)** Representative Oil Red O stained whole cardiac sections from *Csn6*-cKO and control mice at 6 weeks of age (n=4 per group). Scale bar: 2mm. **(C)** Echocardiographic M-mode analysis of heart function in *Csn6* deficient and control mice at 6 weeks of age and post-tamoxifen injection (n=6 mice). FS %: percent fractional shortening, LVIDd: left ventricular internal dimension at end-diastole. LVIDs: left ventricular internal dimension at end-systole. Data are mean  $\pm$  s.e.m.; two-tailed Student's t-test, \* $P$ <0.05; \*\* $P$ <0.01; \*\*\* $P$ <0.001; ns, not significant. **(D)** Echocardiographic M-mode analysis of heart function in *Csn6*-iKO and control mice at 2 weeks post tamoxifen injection (n=4 mice). Data are mean  $\pm$  s.e.m.; two-tailed Student's t-test, ns, not significant. **(E)** Representative conscious ECG tracings from *Csn6*-iKO (red) and control mice (black) at 2 weeks post tamoxifen injection (n=4 mice). Arrows denotes ectopic beats.



## Supplemental Figure 6

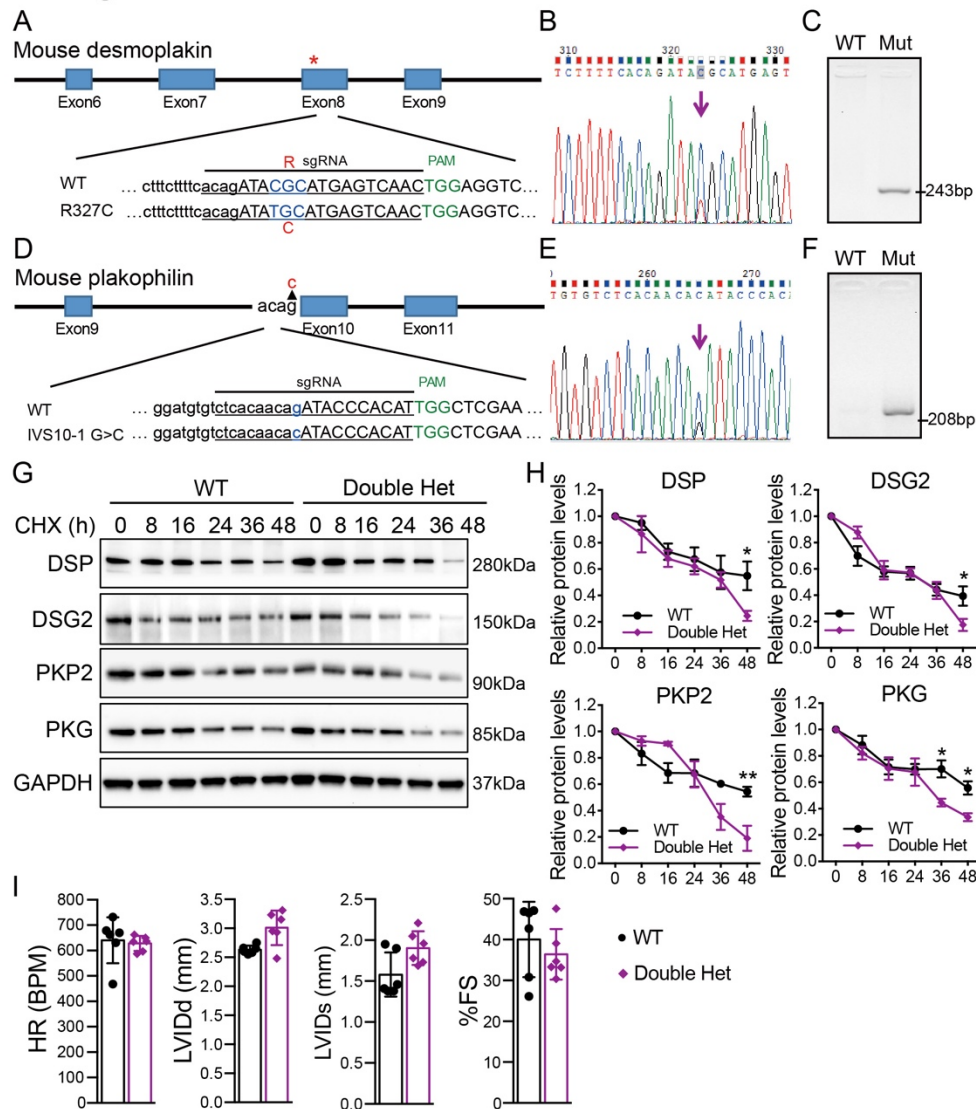

**Supplemental Figure 6: Generation and characterization of knock-in mice harboring human equivalent *DSP* R315C and *PKP2* IVS10-1 G>C mutations.** (A and D) Schematic of the Cas9/sgrRNA targeting site for the *Dsp* R327C (A) and *Pkp2* IVS10-1 G>C (D) which are equivalent to the human R315C mutation and *PKP2* IVS10-1 G>C respectively. The sgRNA coding sequence is underlined. The protospacer-adjacent motif (PAM) sequence is labeled in green. Uppercase: exon sequences. Lowercase: intron sequences. (B and E) Validation of *Dsp* R327C (B) and *Pkp2* IVS10-1 G>C (E) allele by sequencing. (C and F) PCR using mutant-specific primers confirmed newborn mice contained the correct gene variant allele. (G and H) Representative protein blots (G) and quantification analyses (H) of desmosomal proteins in ventricular cardiomyocytes which isolated from Double Het and WT pups. The cardiomyocytes

were treated with cycloheximide (CHX, 10  $\mu$ g/ml) for 0, 8, 16, 24, 36 and 48 hours. The expression levels of proteins were normalized to the loading control GAPDH. Data are mean  $\pm$  s.e.m; two-way ANOVA with Sidak multiple comparison test, \* $P$ <0.05, \*\* $P$ <0.01. (I) Echocardiographic M-mode analysis of left ventricular dimensions and function in Double Het and WT mice at 4 months of age (n=6 mice). FS %: percent fractional shortening, LVIDd: left ventricular internal dimension at end-diastole. LVIDs: left ventricular internal dimension at end-systole. Data are mean  $\pm$  s.e.m.; two-tailed Student's t-test.

## Supplemental Figure 7

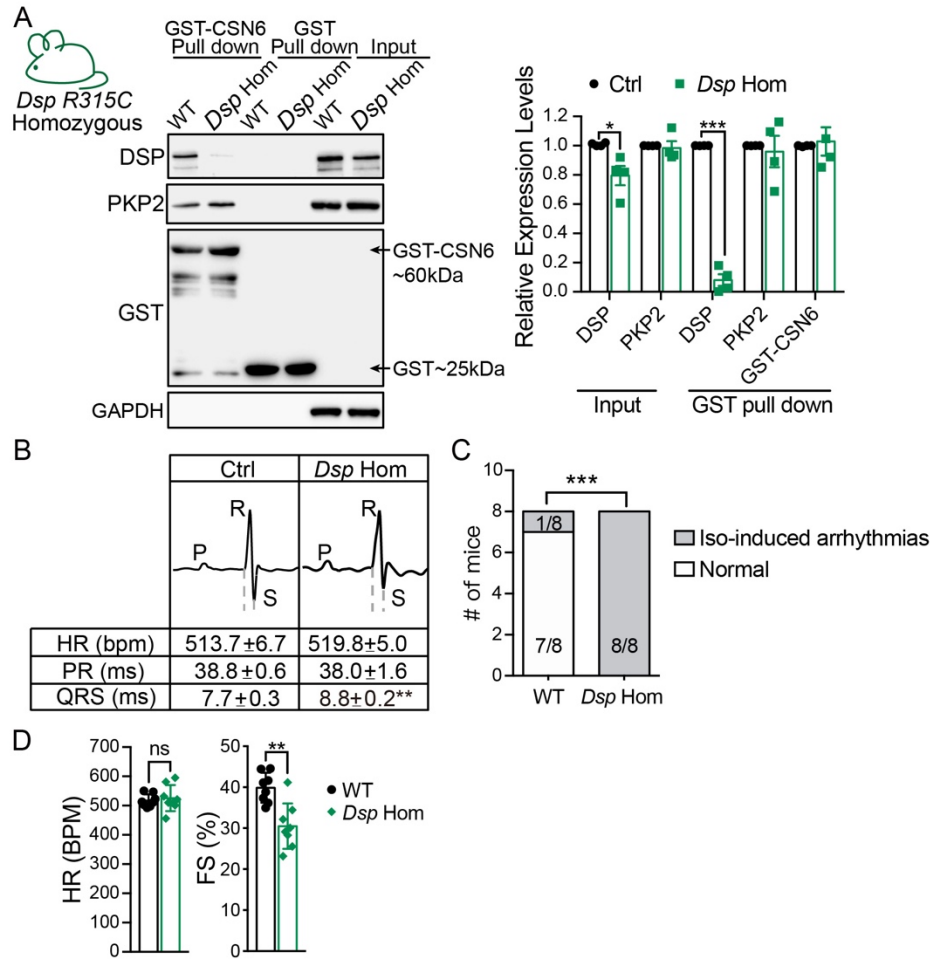

**Supplemental Figure 7: Characterization of *Dsp R315C* homozygous mice.** (A) Protein blot analyses and quantification of protein expression levels following GST pulldown assay. GST (~25kDa) and GST-CSN6 (~60kDa) protein were incubated with the heart extracts from WT and *Dsp R315C* homozygous mice (*Dsp Hom*) at 1 year of age (n=4 per group). The expression levels of input proteins were normalized to the loading control GAPDH. Data are mean ± s.e.m; two-way ANOVA with Sidak multiple comparison test, \**P*<0.05, \*\*\**P*<0.001. (B) Representative surface ECG tracings in *Dsp R315C* homozygous and WT mice at 1 year of age (n=8 per group). Quantification of heart rate (HR), PR and QRS intervals from ECG tracings was performed. Data from 100 ECG tracings per mouse were averaged for analysis. Data are mean ± s.e.m; Student's two-tailed t-test, \*\**P*<0.01. QRS duration is indicated by the dotted line. (C) Quantification of number of *Dsp R315C* homozygous and WT mice which displayed arrhythmia with 2.5mg/kg

isoproterenol treatment during ECG recording at 1 year of age (n=8 per group). Chi-square test, \*\*\* $P<0.05$ . **(D)** Echocardiographic M-mode analysis of left ventricular dimensions and function in *Dsp R315C* homozygous and WT mice at 1 year of age (n=8 per group). HR: heart rate; FS %: percent fractional shortening. Data are mean  $\pm$  s.e.m.; Student's two-tailed t-test. \*\* $P<0.01$ , no significant differences.

**Supplemental Table 1: *Dsp R315C* and *Pkp2 IVS10-1 G>C* crRNA, trans-activating crRNA (tracrRNA), and single-strand oligodeoxynucleotides sequences used to generate knockin mice.**

| Oligo Name                       | Sequence (5' to 3')                                                                                                     |
|----------------------------------|-------------------------------------------------------------------------------------------------------------------------|
| <i>Dsp R315C</i> crRNA           | acagauacgcaugagucaacGUUUUAGAGCUAUGCUGUUUUG                                                                              |
| <i>Pkp2 IVS10-1 G&gt;C</i> crRNA | cucacaacagauacccacauGUUUUAGAGCUAUGCUGUUUUG                                                                              |
| tracrRNA                         | AAACAGCAUAGCAAGUUAAAAUAAGGCUAGUCCGUUAUCAAC<br>UUGAAAAAGUGGCACCGAGUCGGUGCU                                               |
| <i>Dsp R315C</i> DNA             | AACAGAAATCTAACTGTGACTTGCTGTATGGACTGGTCCTTTCTTTTC<br>ACAGATATGCATGAGTCAACTGGAGGTCAAGGAAAAGGAACTCAAT<br>AAGCTTAAACAAGAAAG |
| <i>Pkp2 IVS10-1</i> DNA          | AGAGAACTTCTCTGGTAGCAAATGTGATAGCATTTACAGGATGTGTC<br>TCACAACACATACCACATTGGTGGCTCGAATGGTTGTCCAAAAGGA<br>AAATGGTCTTCAGCATA  |

**Supplemental Table 2: Primer sequences for real-time PCR analyses.**

| Gene           | Primer 5'-3'            |
|----------------|-------------------------|
| <i>Csn6</i> -F | GAGCTGGAGTTTCTGGGTTG    |
| <i>Csn6</i> -R | GATCCGTTTCAGCTTCCTCAG   |
| <i>Dsp</i> -F  | GCTCCATTACCAAGACTTCATC  |
| <i>Dsp</i> -R  | TGTCGTCGTCTCCAAACATCT   |
| <i>Dsg2</i> -F | GAGGAATTGAGTGCAGCACATAC |
| <i>Dsg2</i> -R | CTTGCTTCCACCGTCAAGG     |
| <i>Dsc2</i> -F | ATGCAGATGGGAGAAGCTGT    |
| <i>Dsc2</i> -R | TGCAACAATTTTCAGCAGAGG   |
| <i>Pkp2</i> -F | GGCTCTCCAGAACCTCACAG    |
| <i>Pkp2</i> -R | GGGAAAGATTCCGTGACAAA    |
| <i>Pkg</i> -F1 | CCTGTGGACTCTGCGCAAT     |
| <i>Pkg</i> -R1 | GACCAGGATCTTCAGCACACTCT |
